# Supplementary material for: Optimizing thienothiophene chain lengths of D–π–D hole transport materials in perovskite solar cells for improving energy levels and hole mobility
Source: Royal Society of Chemistry journal article supplement (doi:10.1039/c7tc03232c), 2017-01-01
Supplement: c7tc03232c1.pdf [file c7tc03232c1.pdf]

**Optimizing thienothiophene chain lengths of D- $\pi$ -D hole transport materials in perovskite solar cells to improving energy levels and hole mobility**

Wei-Jie Chi<sup>1,a</sup>, Dao-Yuan Zheng<sup>1,b</sup>, Xiao-Fang Chen<sup>\*,b</sup> and Ze-Sheng Li<sup>\*,a</sup>

*<sup>a</sup> Beijing Key Laboratory of Photoelectronic/Electrophotonic Conversion Materials, Key Laboratory of Cluster Science of Ministry of Education, School of Chemistry and Chemical Engineering, Beijing Institute of Technology, Beijing 100081, China.*

*<sup>b</sup> State Key Laboratory of Molecular Reaction Dynamics, Dalian Institute of Chemical Physics, Chinese Academy of Science, Zhongshan Road 457, Dalian 116023, China.*

**\*Corresponding Authors**

[xfchen@dicp.ac.cn](mailto:xfchen@dicp.ac.cn) (X. F. Chen); [zeshengli@bit.edu.cn](mailto:zeshengli@bit.edu.cn) (Z. S. Li)

<sup>1</sup> Wei-Jie Chi and Dao-Yuan Zheng contribute equally to this work

Table S1 The calculated ionization potential, electron affinity, and fundamental gap of SS-2 – SS-6, unit in eV

| Molecules | IP   | EA   | Fundamental gap |
|-----------|------|------|-----------------|
| ss-2      | 4.46 | 1.78 | 2.68(2.71)      |
| ss-3      | 4.47 | 1.87 | 2.60            |
| ss-4      | 4.48 | 1.94 | 2.52            |
| ss-5      | 4.49 | 2.01 | 2.48            |
| ss-6      | 4.50 | 2.06 | 2.39            |

Table S2 Calculated maximum absorption wavelength ( $\lambda_{\text{max}}$ , nm), maximum emission wavelengths( $\lambda_{\text{emi}}$ , nm), stokes shift (nm), and main configurations.

| Molecules | $\lambda_{\text{max}}$ | Main configurations | $\lambda_{\text{em}}$ | Stokes shift |
|-----------|------------------------|---------------------|-----------------------|--------------|
| ss-2      | 394(410)               | H-L(89%)            | 492                   | 98           |
| ss-3      | 410                    | H-L(89%)            | 507                   | 97           |
| ss-4      | 422                    | H-L(87%)            | 519                   | 97           |
| ss-5      | 434                    | H-L(86%)            | 528                   | 94           |
| ss-6      | 444                    | H-L(85%)            | 534                   | 90           |

H denotes HOMO, L denotes LUMO

Table S3 Predicted crystal data of investigated molecules.

| Molecules | Space group | $\rho$ | $Z$ | a     | b     | c     | $\alpha$ | $\beta$ | $\gamma$ |
|-----------|-------------|--------|-----|-------|-------|-------|----------|---------|----------|
| SS-2      | P1          | 1.219  | 2   | 17.00 | 14.16 | 12.11 | 52.10    | 86.92   | 66.50    |
| SS-3      | P1          | 1.287  | 2   | 11.75 | 12.31 | 14.69 | 90.25    | 102.12  | 94.43    |
| SS-4      | P1          | 1.269  | 2   | 13.76 | 23.83 | 9.46  | 100.68   | 51.49   | 82.01    |
| SS-5      | P1          | 1.302  | 2   | 13.04 | 15.05 | 12.38 | 85.83    | 102.60  | 99.91    |
| SS-6      | P1          | 1.305  | 2   | 15.35 | 20.94 | 14.79 | 48.45    | 44.05   | 62.30    |

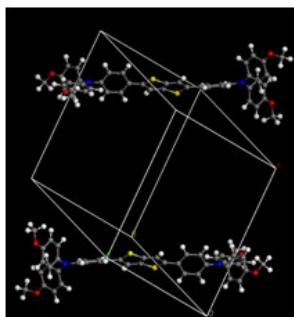

SS-2-crystal P1

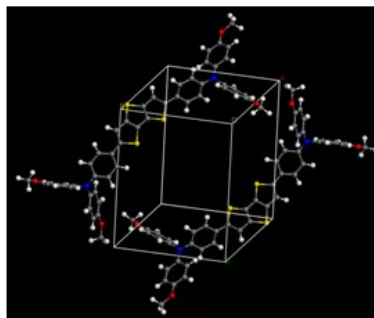

SS-3-crystal P1

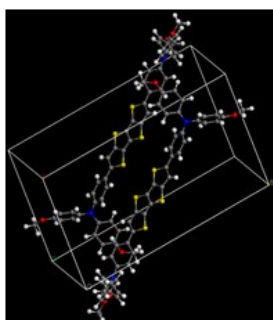

SS-4-crystal P1

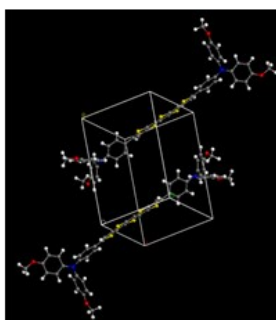

SS-5-crystal P1

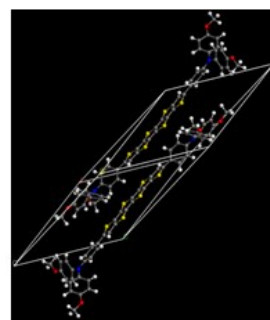

SS-6-crystal P1

Figure S1 Predicted crystal structures of investigated molecules.
